# Supplementary material for: Value-Added Utilization of Citrus Peels in Improving Functional Properties and Probiotic Viability of Acidophilus-bifidus-thermophilus (ABT)-Type Synbiotic Yoghurt during Cold Storage
Source: MDPI journal article supplement (doi:10.3390/foods11172677), 2022-09-02
Supplement: s1 [file s1]

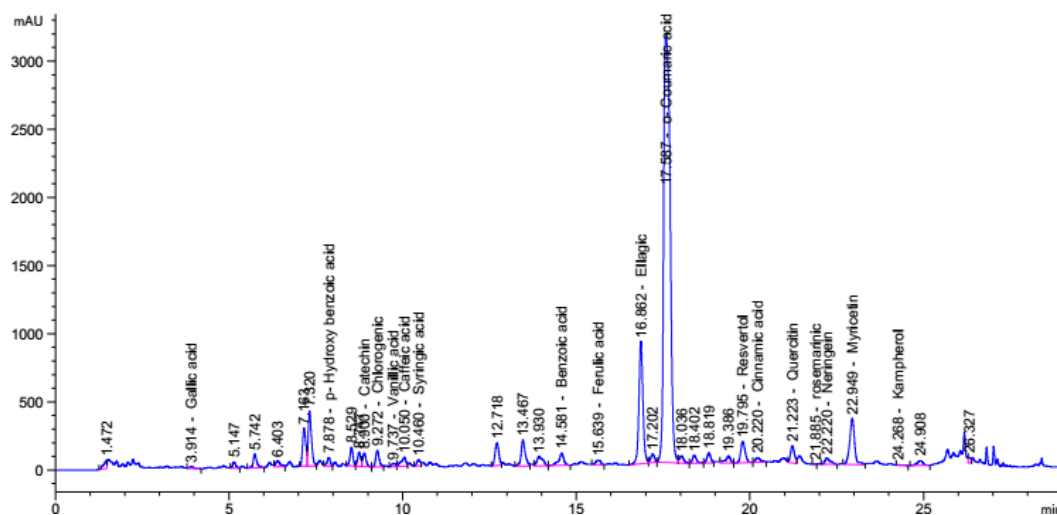

**Figure S1.** HPLC chromatogram of SO peel extract integrated at 284 nm

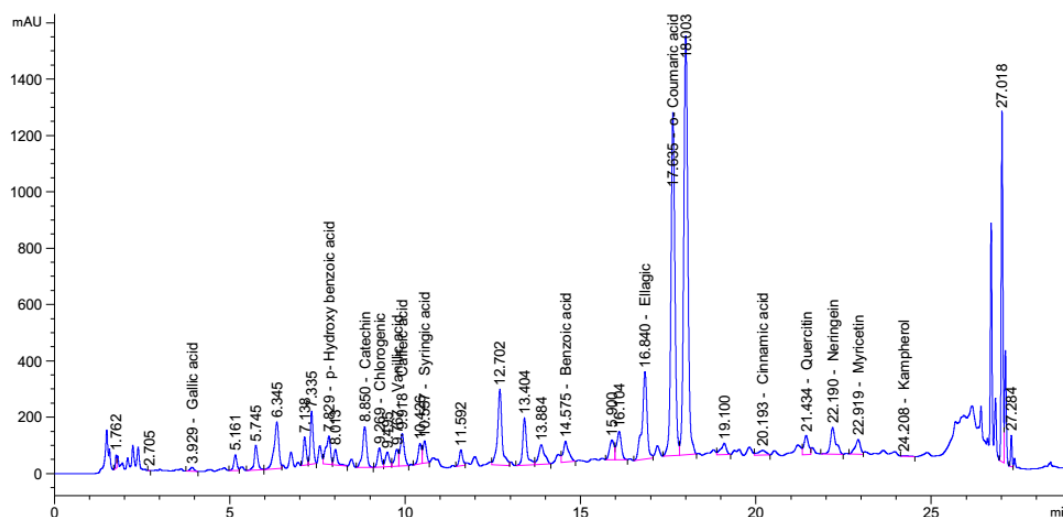

**Figure S2.** HPLC chromatogram of SWO peel extract integrated at 284 nm

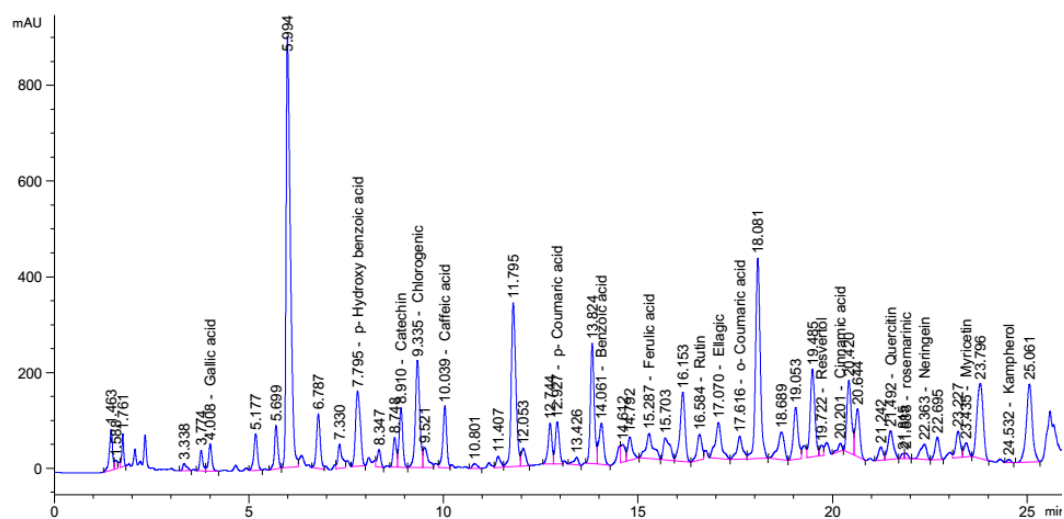

**Figure S3.** HPLC chromatogram of LO peel extract integrated at 284 nm

**Table S1.** Validation parameters for HPLC-DAD determinations of polyphenols in citrus peel extracts.

| Analyte                       | $R_t$<br>(time) | Linear equation<br>( $y=ax+b$ ) | $R^2$  | Linear<br>range<br>(mg/L) | LOD<br>( $\mu\text{g/L}$ ) | LOQ<br>( $\mu\text{g/L}$ ) | Intra-day<br>precision<br>(%) | Inter-day<br>precision<br>(%) |
|-------------------------------|-----------------|---------------------------------|--------|---------------------------|----------------------------|----------------------------|-------------------------------|-------------------------------|
| Gallic acid                   | 3.91            | $y=141290x-492.8$               | 0.9959 | 0.01-1                    | 0.039                      | 0.113                      | 1.51                          | 3.52                          |
| Catechin                      | 5.40            | $y=100585x+818.4$               | 0.9998 | 0.03-4                    | 0.048                      | 0.144                      | 2.04                          | 4.25                          |
| <i>p</i> -Hydroxybenzoic acid | 7.88            | $y=30452x-1723.6$               | 0.9951 | 0.005-1                   | 0.043                      | 0.132                      | 1.03                          | 3.47                          |
| Chlorogenic acid              | 9.27            | $y=49315x-825.1$                | 0.9994 | 0.05-2                    | 0.019                      | 0.060                      | 0.94                          | 1.91                          |
| Vanillic acid                 | 9.74            | $y=90438x-1471.8$               | 0.9999 | 0.5-3                     | 0.051                      | 0.149                      | 1.11                          | 2.98                          |
| Caffeic acid                  | 10.05           | $y=101252x-706.1$               | 0.9962 | 0.01-1                    | 0.010                      | 0.033                      | 0.85                          | 1.54                          |
| Syringic acid                 | 10.46           | $y=69438x-1095.5$               | 0.9998 | 0.01-1                    | 0.070                      | 0.206                      | 1.83                          | 5.73                          |
| <i>p</i> -Coumaric acid       | 13.06           | $y=160581x+815.9$               | 0.9994 | 0.01-1                    | 0.040                      | 0.123                      | 2.61                          | 6.91                          |
| Benzoic acid                  | 14.58           | $y=58452x-2940.8$               | 0.9999 | 0.01-1                    | 0.002                      | 0.005                      | 1.82                          | 5.19                          |
| Ferulic acid                  | 15.64           | $y=50755x+1526.3$               | 0.9969 | 0.005-1                   | 0.049                      | 0.168                      | 1.06                          | 4.55                          |
| Rutin                         | 16.70           | $y=36828x+993.6$                | 0.9995 | 0.03-3                    | 0.073                      | 0.215                      | 1.18                          | 3.82                          |
| Ellagic acid                  | 16.86           | $y=66692x-1940.9$               | 0.9983 | 0.02-2                    | 0.082                      | 0.239                      | 0.9                           | 1.92                          |
| <i>o</i> -Coumaric acid       | 17.59           | $y=70895x-1893.2$               | 0.9993 | 0.5-5                     | 0.091                      | 0.028                      | 0.42                          | 1.73                          |
| Resveratrol                   | 19.80           | $y=109410x+1023.6$              | 0.9964 | 0.05-1                    | 0.068                      | 0.186                      | 2.04                          | 5.28                          |
| Cinnamic acid                 | 20.22           | $y=110452x-982.7$               | 0.9989 | 0.02-1                    | 0.053                      | 0.157                      | 1.15                          | 3.59                          |
| Quercetin                     | 21.22           | $y=36327x-3345.8$               | 0.9991 | 0.02-1                    | 0.062                      | 0.173                      | 2.34                          | 7.13                          |
| Rosemarinic acid              | 21.89           | $y=91782x+8619.3$               | 0.9999 | 0.02-1                    | 0.079                      | 0.213                      | 0.85                          | 2.81                          |
| Naringin                      | 22.22           | $y=44694x-3749.8$               | 0.9995 | 0.02-1                    | 0.036                      | 0.072                      | 1.24                          | 4.92                          |
| Myricetin                     | 22.95           | $y=51396x-5721.7$               | 0.9993 | 0.5-5                     | 0.035                      | 0.106                      | 0.83                          | 4.18                          |
| Kaempferol                    | 24.27           | $y=30451x-1723.6$               | 0.9976 | 0.02-1                    | 0.054                      | 0.152                      | 2.36                          | 5.06                          |

**Table S2.** Profiles of polyphenolic compounds ( $\mu\text{g/g}$  milk) in ABT synbiotic yoghurt with citrus peel addition.

| Compounds      |                               | ABT fermented milk with different citrus peels |                 |                 |
|----------------|-------------------------------|------------------------------------------------|-----------------|-----------------|
|                |                               | SO peel                                        | SWO peel        | LO peel         |
| Phenolic acids |                               |                                                |                 |                 |
| 1              | <i>o</i> -Coumaric acid       | $5.15 \pm 0.12$                                | $1.24 \pm 0.05$ | $0.07 \pm 0.00$ |
| 2              | Benzoic acid                  | $4.72 \pm 0.05$                                | $4.13 \pm 0.07$ | $3.79 \pm 0.10$ |
| 3              | Ellagic acid                  | $2.96 \pm 0.05$                                | $1.02 \pm 0.05$ | $0.31 \pm 0.02$ |
| 4              | <i>p</i> -Hydroxybenzoic acid | $0.42 \pm 0.01$                                | $0.81 \pm 0.06$ | $1.21 \pm 0.03$ |
| 5              | Chlorogenic acid              | $0.28 \pm 0.01$                                | $0.12 \pm 0.01$ | $0.48 \pm 0.06$ |
| 6              | Caffeic acid                  | $0.11 \pm 0.01$                                | $0.15 \pm 0.01$ | $0.14 \pm 0.01$ |
| 7              | Cinnamic acid                 | $0.07 \pm 0.01$                                | $0.05 \pm 0.01$ | $0.01 \pm 0.00$ |
| 8              | Gallic acid                   | $0.03 \pm 0.00$                                | $0.03 \pm 0.00$ | $0.08 \pm 0.00$ |
| 9              | Vanillic acid                 | $0.07 \pm 0.01$                                | $0.24 \pm 0.01$ | n.d.            |
| 10             | Syringic acid                 | $0.11 \pm 0.00$                                | $0.15 \pm 0.02$ | n.d.            |
| 11             | Ferulic acid                  | $0.13 \pm 0.01$                                | n.d.            | $0.12 \pm 0.01$ |
| 12             | Rosemarinic acid              | $0.08 \pm 0.01$                                | n.d.            | $0.32 \pm 0.01$ |
| 13             | <i>p</i> -Coumaric acid       | n.d.                                           | n.d.            | $0.09 \pm 0.01$ |
| Stilbenes      |                               |                                                |                 |                 |
| 1              | Resveratrol                   | $3.79 \pm 0.04$                                | n.d.            | $0.48 \pm 0.01$ |
| Flavonoids     |                               |                                                |                 |                 |
| 1              | Myricetin                     | $10.17 \pm 0.19$                               | $1.64 \pm 0.05$ | $0.63 \pm 0.03$ |
| 2              | Quercetin                     | $2.85 \pm 0.06$                                | $1.85 \pm 0.04$ | $1.59 \pm 0.08$ |
| 3              | Naringin                      | $1.83 \pm 0.05$                                | $3.29 \pm 0.07$ | $1.08 \pm 0.02$ |
| 4              | Kaempferol                    | $0.02 \pm 0.01$                                | $0.07 \pm 0.01$ | $0.08 \pm 0.01$ |
| 5              | Catechin                      | $0.15 \pm 0.01$                                | $0.21 \pm 0.01$ | $0.11 \pm 0.01$ |
| 6              | Rutin                         | n.d.                                           | n.d.            | $0.81 \pm 0.03$ |
